# Supplementary material
Source: ML conference proceedings conference paper supplement (https://openaccess.thecvf.com/content/ICCV2023/html/Cho_Non-Coaxial_Event-Guided_Motion_ICCV_2023_paper.html)
Supplement: Supplementary file 1 [file Cho_Non-Coaxial_Event-Guided_Motion_ICCV_2023_supplemental.zip]

# Non-Coaxial Event-guided Motion Deblurring with Spatial Alignment

Hoonhee Cho, Yuhwan Jeong, Taewoo Kim, and Kuk-Jin Yoon

Korea Advanced Institute of Science and Technology

{gnsngsngml, jeongyh98, intelpro, kjyoon}@kaist.ac.kr

Due to the limitation of space in the main paper, we provide a more detailed analysis of the proposed NED-Net and present more experimental results in this supplementary material. Specifically, in Sec. 1, we describe the details of the datasets. In Sec. 2 and 3, we provide more qualitative results. In Sec. 4, we provide the video demo. Lastly, in Sec. 5, we provide additional experiments and discussion.

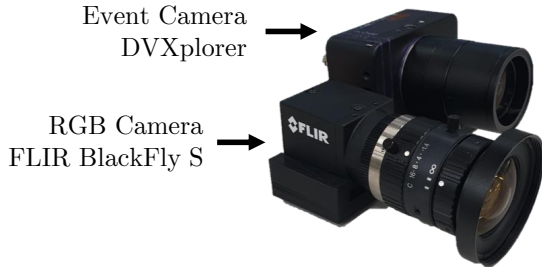

Figure 1: Illustration of the camera setup. It consists of a DVXplorer event camera and a FLIR BlackFly S RGB camera.

## 1. Non-Coaxial Events and RGB dataset

The proposed NCER dataset was acquired with a separate high-resolution event camera and a high-frame-rate RGB camera. As shown in Fig. 1, the two cameras are placed side by side, with a baseline of 3 cm. The details of the NCER dataset are in Table 2 and 3, and some samples are provided in Fig. 2 and 3.

## 2. More Qualitative Results

We provide more qualitative results here. The qualitative results on the NCER dataset are in Fig. 4, 5, 6, and 7.

## 3. Real Blur Experiments

We further analyze whether the network trained on the NCER dataset can work on real blur images. As shown in Fig. 8, we provide comparison results of networks on the real blur images generated by moving the camera during the exposure time. Therefore, only qualitative evaluation is

Table 1: Comparison of PSNR (dB) and SSIM from other methods and our approach. We train networks on both the NCER and NCER-E datasets, and evaluate networks on both datasets. The best score is **highlighted**. The second-best scores are underlined.

| Train         | NCER-F + NCER-E |               |              |               |
|---------------|-----------------|---------------|--------------|---------------|
| Test          | NCER-F          |               | NCER-E       |               |
| Method        | PSNR↑           | SSIM↑         | PSNR↑        | SSIM↑         |
| Frame         |                 |               |              |               |
| HINet [1]     | 27.45           | 0.8144        | 31.72        | 0.8829        |
| MPRNet [5]    | 27.68           | 0.8261        | <u>32.24</u> | <u>0.8961</u> |
| Frame + Event |                 |               |              |               |
| EFNet [3]     | 26.66           | 0.7970        | 31.35        | 0.8788        |
| RED-Net [4]   | 27.79           | 0.8334        | 31.54        | 0.8837        |
| UEVD [2]      | 27.91           | <u>0.8341</u> | 31.63        | 0.8835        |
| NED-Net       | <b>28.40</b>    | <b>0.8417</b> | <b>33.07</b> | <b>0.9048</b> |

possible because ground truth does not exist. The networks using events generalize better for real blur than the only image method. Instead, existing event-based networks still do not handle alignment, so they often provide ghosting effects and cannot restore objects sharply. On the other hand, our NED-Net has the best generalization to real blur and sharply restores the texture considering the alignment, even in real blur.

## 4. Video Demonstration

To show that the results of our network perform well compared to other methods in the overall sequence, not cherry-picking for specific scenes, we provide a video file. Please pause in the middle of the video and watch it for a better visual comparison.

## 5. Additional Experiments

**Can a unitary network learn two different distributions of datasets at once?** Table 1 reports the results of training and evaluation in both NCER-F and NCER-E datasets. If a network trained on both datasets learns all distributions well, it should achieve high performance on both test sets. When comparing existing frame-based and event-based methods, event-based methods are generally domi-

nant in the NCER-F dataset. In the NCER-F dataset, misalignment is insignificant; thus, existing event-based methods show better performance than frame-based methods by aligning two modalities. Conversely, frame-based methods are prevalent in the NCER-E dataset. In the NCER-E dataset, misalignment is quite significant, making it difficult to align in event-based methods. Although trained on both datasets, the performance of existing event-based methods is biased towards the NCER-F dataset and underperforms on the NCER-E dataset. Also, this performance is relatively poor compared to training and testing only in the NCER-E dataset (Table 2 in the main paper). These results demonstrate that previous event-based methods cannot handle the different distributions of misalignment within a single network, even trained on both datasets. On the other hand, our NED-Net achieves the best performance in both the NCER-F and the NCER-E datasets by a large margin compared with previous event-based and only frame-based methods. In addition, the performance in the NCER-E dataset is comparable to the results of Table 2 in the main paper. These results validate that our NED-Net can handle the misalignment of various distributions even with one single network.

## References

- [1] Liangyu Chen, Xin Lu, Jie Zhang, Xiaojie Chu, and Chengpeng Chen. Hinet: Half instance normalization network for image restoration. In *Proceedings of the IEEE/CVF Conference on Computer Vision and Pattern Recognition*, pages 182–192, 2021. [1](#)
- [2] Taewoo Kim, Jeongmin Lee, Lin Wang, and Kuk-Jin Yoon. Event-guided deblurring of unknown exposure time videos. In *Proceedings of the European Conference on Computer Vision (ECCV)*, 2022. [1](#)
- [3] Lei Sun, Christos Sakaridis, Jingyun Liang, Qi Jiang, Kailun Yang, Peng Sun, Yaozu Ye, Kaiwei Wang, and Luc Van Gool. Event-based fusion for motion deblurring with cross-modal attention. In *European Conference on Computer Vision (ECCV)*, 2022. [1](#)
- [4] Fang Xu, Lei Yu, Bishan Wang, Wen Yang, Gui-Song Xia, Xu Jia, Zhendong Qiao, and Jianzhuang Liu. Motion deblurring with real events. In *Proceedings of the IEEE/CVF International Conference on Computer Vision (ICCV)*, pages 2583–2592, October 2021. [1](#)
- [5] Syed Waqas Zamir, Aditya Arora, Salman Khan, Munawar Hayat, Fahad Shahbaz Khan, Ming-Hsuan Yang, and Ling Shao. Multi-stage progressive image restoration. *arXiv preprint arXiv:2102.02808*, 2021. [1](#)

Table 2: Overview of the proposed NCER-F dataset. We adjust the number of averaged frames to vary the intensity of the blur.

| Sequence Name                      | No. Frames | No. Average | Description                                                                              |
|------------------------------------|------------|-------------|------------------------------------------------------------------------------------------|
| <b>Train Set</b>                   |            |             |                                                                                          |
| Rooftop far away building 1        | 1957       | 15          | Outdoor, very far away scene, rotation z-axis                                            |
| Rooftop far away building 2        | 1821       | 27          | Outdoor, very far away scene, rotation z-axis, moving objects                            |
| Rooftop view first floor           | 1426       | 15          | Outdoor, close and far away scene, rotation z-axis, fast motion, accelerating object     |
| Traffic sign background trees road | 1556       | 19          | Outdoor, close scene, rotation z-axis and x-axis, accelerating object                    |
| Flower with traffic sign           | 346        | 25          | Outdoor, close scene, dynamic motion                                                     |
| Cross walk with traffic sign 1     | 489        | 11          | Outdoor, close scene, dynamic and fast motion                                            |
| Gym in the shade                   | 721        | 15          | Outdoor, close scene, rotation z-axis, accelerating object, reflection object            |
| Gym outer wall 1                   | 697        | 21          | Outdoor, close scene, rotation z-axis, reflection, repetitive pattern                    |
| Building 1                         | 914        | 19          | Outdoor, close scene, rotation z-axis, text, repetitive pattern                          |
| Building 2                         | 868        | 21          | Outdoor, far away scene, random rotation, moving object, repetitive pattern              |
| Building 3                         | 756        | 25          | Outdoor, far away scene, random rotation, repetitive pattern                             |
| Building 4                         | 831        | 17          | Outdoor, close scene, rotation y-axis, fast motion, heavily repetitive pattern           |
| Building 5                         | 1089       | 23          | Outdoor, far away scene, rotation z-axis, repetitive pattern                             |
| Pond 1                             | 1094       | 25          | Outdoor, close and far away scene, dynamic motion, fast motion, non-linear motion, water |
| Tree background pond               | 920        | 29          | Outdoor, close scene, rotation z-axis, water, reflection                                 |
| Statue 1                           | 606        | 29          | Outdoor, close scene, random rotation, text, repetitive pattern                          |
| Bike                               | 827        | 21          | Outdoor, close scene, rotation y-axis, text, repetitive pattern                          |
| Parking 1                          | 810        | 15          | Outdoor, close scene, dynamic motion, text, reflection, repetitive pattern               |
| Parking 2                          | 1581       | 21          | Outdoor, close scene, rotation z-axis, text, repetitive pattern                          |
| Tree 1                             | 346        | 25          | Outdoor, close scene, random rotation                                                    |
| Tree background building           | 704        | 17          | Outdoor, far-away scene, rotation z-axis and x-axis                                      |
| Bus 1                              | 260        | 19          | Outdoor, close and far-away scene, dynamic motion, text, repetitive pattern              |
| Bench 1                            | 641        | 31          | Outdoor, close scene, dynamic motion, fast motion                                        |
| Flower pots on the stairs 1        | 999        | 19          | Outdoor, close scene, dynamic motion, repetitive pattern                                 |
| Multi-floor railing 1              | 976        | 23          | Indoor, close scene, rotation x-axis and z-axis, reflection, repetitive pattern          |
| Repetitive pattern ceiling 1       | 519        | 27          | Indoor, far away scene, random rotation, heavily repetitive pattern                      |
| Lounge chair                       | 996        | 23          | Indoor, close scene, random rotation                                                     |

| Sequence Name                  | No.<br>Frames | No.<br>Average | Description                                                                                       |
|--------------------------------|---------------|----------------|---------------------------------------------------------------------------------------------------|
| <b>Test Set</b>                |               |                |                                                                                                   |
| Rooftop far away building 3    | 1444          | 25             | Outdoor, close and far away scene, rotation z-axis                                                |
| Rooftop far away building 4    | 1737          | 25             | Outdoor, very far away scene, rotation z-axis                                                     |
| Pond 2                         | 984           | 25             | Outdoor, close and far away scene, rotation z-axis,<br>reflection, non-linear motion, water       |
| Statue 2                       | 512           | 29             | Outdoor, close scene, rotation y-axis, text, repetitive pattern                                   |
| Parking 3                      | 955           | 19             | Outdoor, close scene, rotation z-axis, text                                                       |
| Gym outer wall 2               | 793           | 25             | Outdoor, close scene, random and dynamic rotation, reflection,<br>fast motion, repetitive pattern |
| Tree 2                         | 426           | 25             | Outdoor, close scene, dynamic motion                                                              |
| Sign and tree                  | 928           | 15             | Outdoor, close scene, random rotation                                                             |
| Building 6                     | 1155          | 21             | Outdoor, close scene, dynamic motion, fast motion,<br>heavily repetitive pattern                  |
| Building 7                     | 1167          | 31             | Outdoor, close scene, dynamic motion, fast motion,<br>heavily repetitive pattern                  |
| Flower pots on the stairs 2    | 930           | 15             | Outdoor, close scene, dynamic motion, repetitive pattern                                          |
| Bench 2                        | 576           | 19             | Outdoor, close scene, dynamic motion, slow motion                                                 |
| Smoking room                   | 888           | 15             | Outdoor, close scene, rotation z-axis and x-axis,<br>fast motion, heavily repetitive pattern      |
| Cross walk with traffic sign 2 | 615           | 15             | Outdoor, close scene, dynamic and fast motion,<br>accelerating object, text                       |
| Repetitive pattern ceiling 2   | 846           | 27             | Indoor, far away scene, random rotation,<br>heavily repetitive pattern                            |
| Multi-floor railing 2          | 979           | 27             | Indoor, close scene, rotation x-axis and z-axis, reflection,<br>repetitive pattern                |

Table 3: Overview of the proposed NCER-E dataset. We adjust the number of averaged frames to vary the intensity of the blur.

| Sequence Name    | No.<br>Frames | No.<br>Average | Description                                                                  |
|------------------|---------------|----------------|------------------------------------------------------------------------------|
| <b>Train Set</b> |               |                |                                                                              |
| Tissue 1         | 724           | 17             | Outdoor, very close scene with faraway objects                               |
| Tissue 2         | 614           | 13             | Outdoor, very close scene with faraway objects                               |
| Tissue 3         | 946           | 15             | Outdoor, very close scene with faraway objects                               |
| Book Black 1     | 689           | 15             | Outdoor, very close scene with faraway objects                               |
| Book White 1     | 886           | 15             | Outdoor, very close scene with faraway objects                               |
| Book White 2     | 961           | 13             | Outdoor, very close scene with faraway objects                               |
| Snack Box        | 426           | 15             | Outdoor, very close scene with faraway objects                               |
| Fan 1            | 815           | 15             | Outdoor, very close scene with faraway objects                               |
| Fan 2            | 329           | 13             | Outdoor, very close scene with faraway objects                               |
| GPU Box 1        | 636           | 11             | Outdoor, very close scene with faraway objects                               |
| Lion Doll 1      | 712           | 15             | Outdoor, very close scene with faraway objects                               |
| Lion Doll 2      | 759           | 13             | Outdoor, very close scene with faraway objects                               |
| Lion Doll 3      | 806           | 15             | Outdoor, very close scene with faraway objects                               |
| Lion Doll 4      | 871           | 11             | Outdoor, very close scene with faraway objects                               |
| Cup 1            | 656           | 11             | Outdoor, very close scene with faraway objects, fast motion with strong blur |
| Cup 2            | 404           | 11             | Outdoor, very close scene with faraway objects, fast motion with strong blur |
| Square Doll 1    | 571           | 7              | Outdoor, very close scene with faraway objects, fast motion with strong blur |
| Square Doll 2    | 325           | 9              | Outdoor, very close scene with faraway objects, fast motion with strong blur |
| Keyboard 1       | 505           | 5              | Outdoor, very close scene with faraway objects, fast motion with strong blur |
| Keyboard 2       | 545           | 9              | Outdoor, very close scene with faraway objects, fast motion with strong blur |
| Lamp 1           | 247           | 9              | Outdoor, very close scene with faraway objects, fast motion with strong blur |
| Lamp 2           | 271           | 7              | Outdoor, very close scene with faraway objects, fast motion with strong blur |

| Sequence Name   | No.<br>Frames | No.<br>Average | Description                                                                  |
|-----------------|---------------|----------------|------------------------------------------------------------------------------|
| <b>Test Set</b> |               |                |                                                                              |
| Tissue 4        | 703           | 11             | Outdoor, very close scene with faraway objects                               |
| Tissue 5        | 1053          | 13             | Outdoor, very close scene with faraway objects                               |
| Book Black 2    | 1082          | 13             | Outdoor, very close scene with faraway objects                               |
| Book Black 3    | 813           | 11             | Outdoor, very close scene with faraway objects                               |
| Book White 3    | 961           | 9              | Outdoor, very close scene with faraway objects                               |
| Fan 3           | 1175          | 15             | Outdoor, very close scene with faraway objects                               |
| Fan 4           | 699           | 13             | Outdoor, very close scene with faraway objects                               |
| GPU Box 2       | 1028          | 11             | Outdoor, very close scene with faraway objects                               |
| Lion Doll 5     | 507           | 15             | Outdoor, very close scene with faraway objects                               |
| Lion Doll 6     | 871           | 11             | Outdoor, very close scene with faraway objects                               |
| Square Doll 3   | 529           | 7              | Outdoor, very close scene with faraway objects, fast motion with strong blur |
| Square Doll 4   | 417           | 7              | Outdoor, very close scene with faraway objects, fast motion with strong blur |
| Keyboard 3      | 328           | 7              | Outdoor, very close scene with faraway objects, fast motion with strong blur |



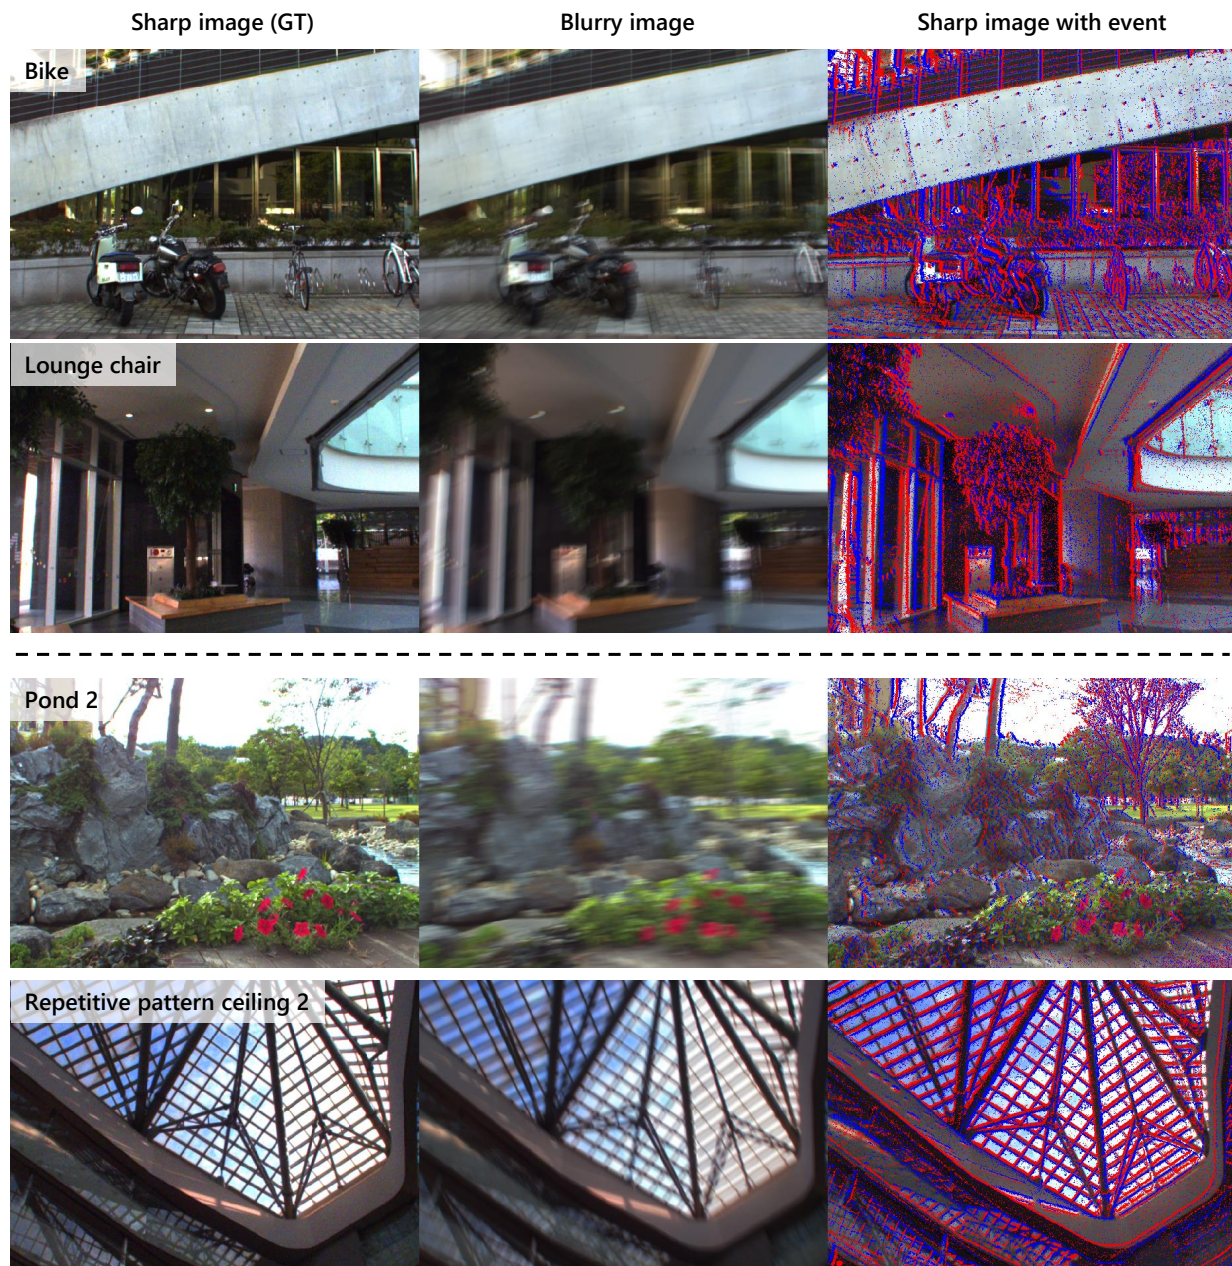

Figure 2: Samples of the proposed NCER-F dataset. **Top:** train, **Bottom:** test sets. Our dataset contains a variety of indoor and outdoor sequences, as well as close and far away scenes. In addition, for general application, the strength of blur varies from sequence to sequence. The third column shows the sharp image and the corresponding events are not spatially aligned.



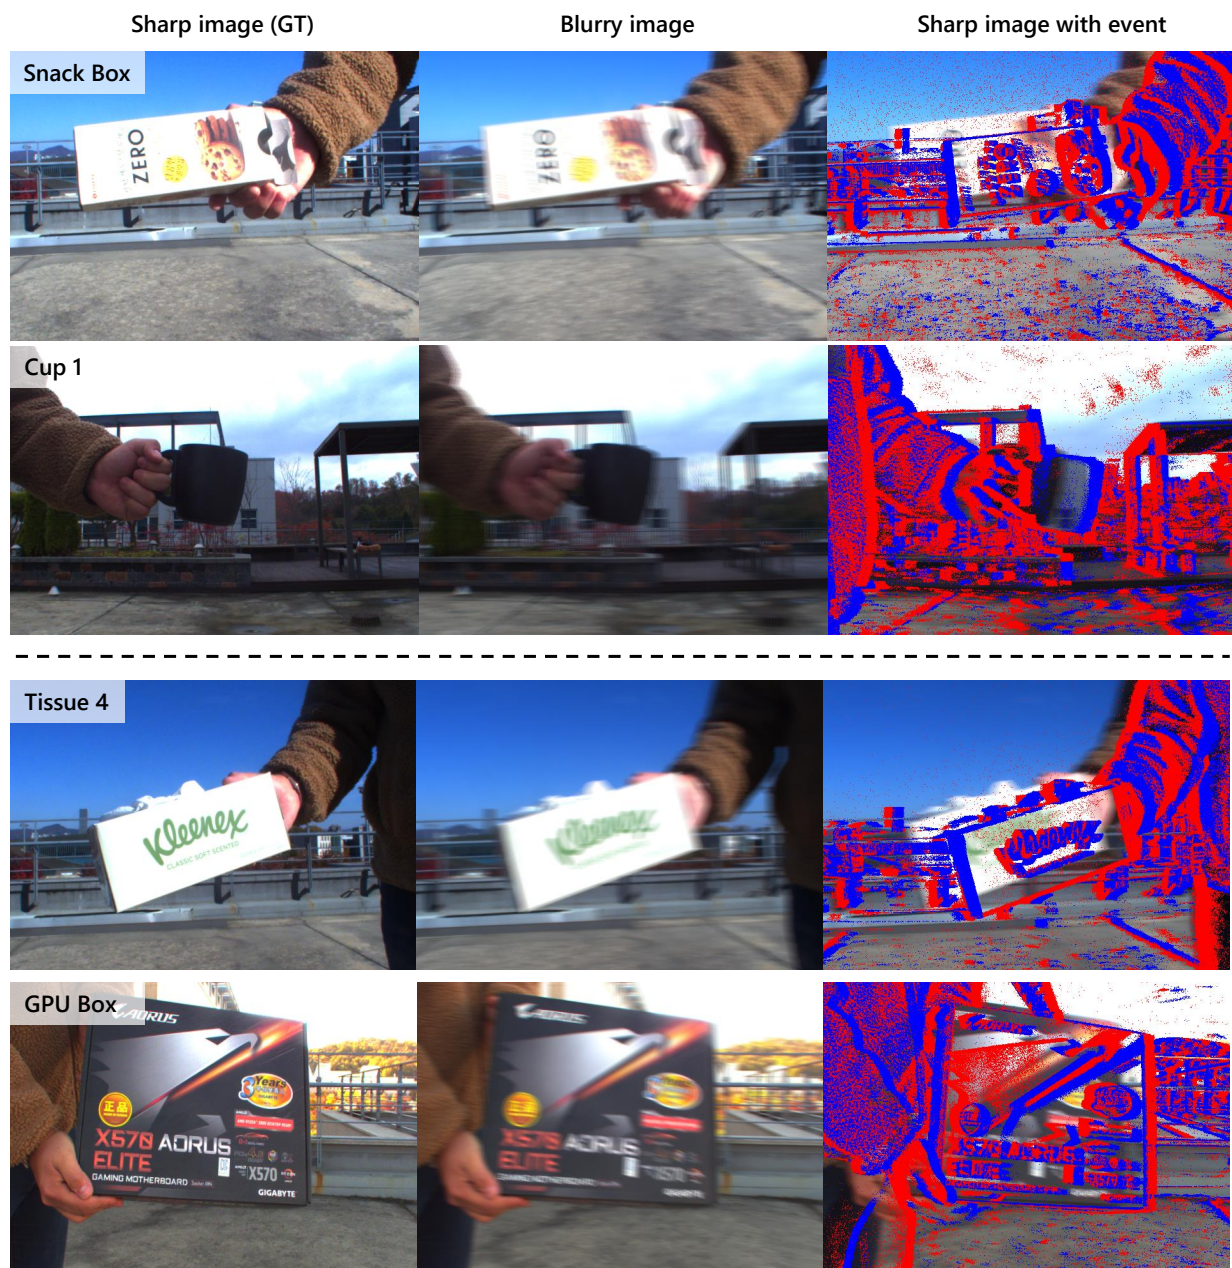

Figure 3: Samples of the proposed NCER-E dataset. **Top:** train, **Bottom:** test sets. It is challenging to precisely align the two modalities using globally explicit alignment because the NCER-E dataset consists of objects that are both close and far away simultaneously.



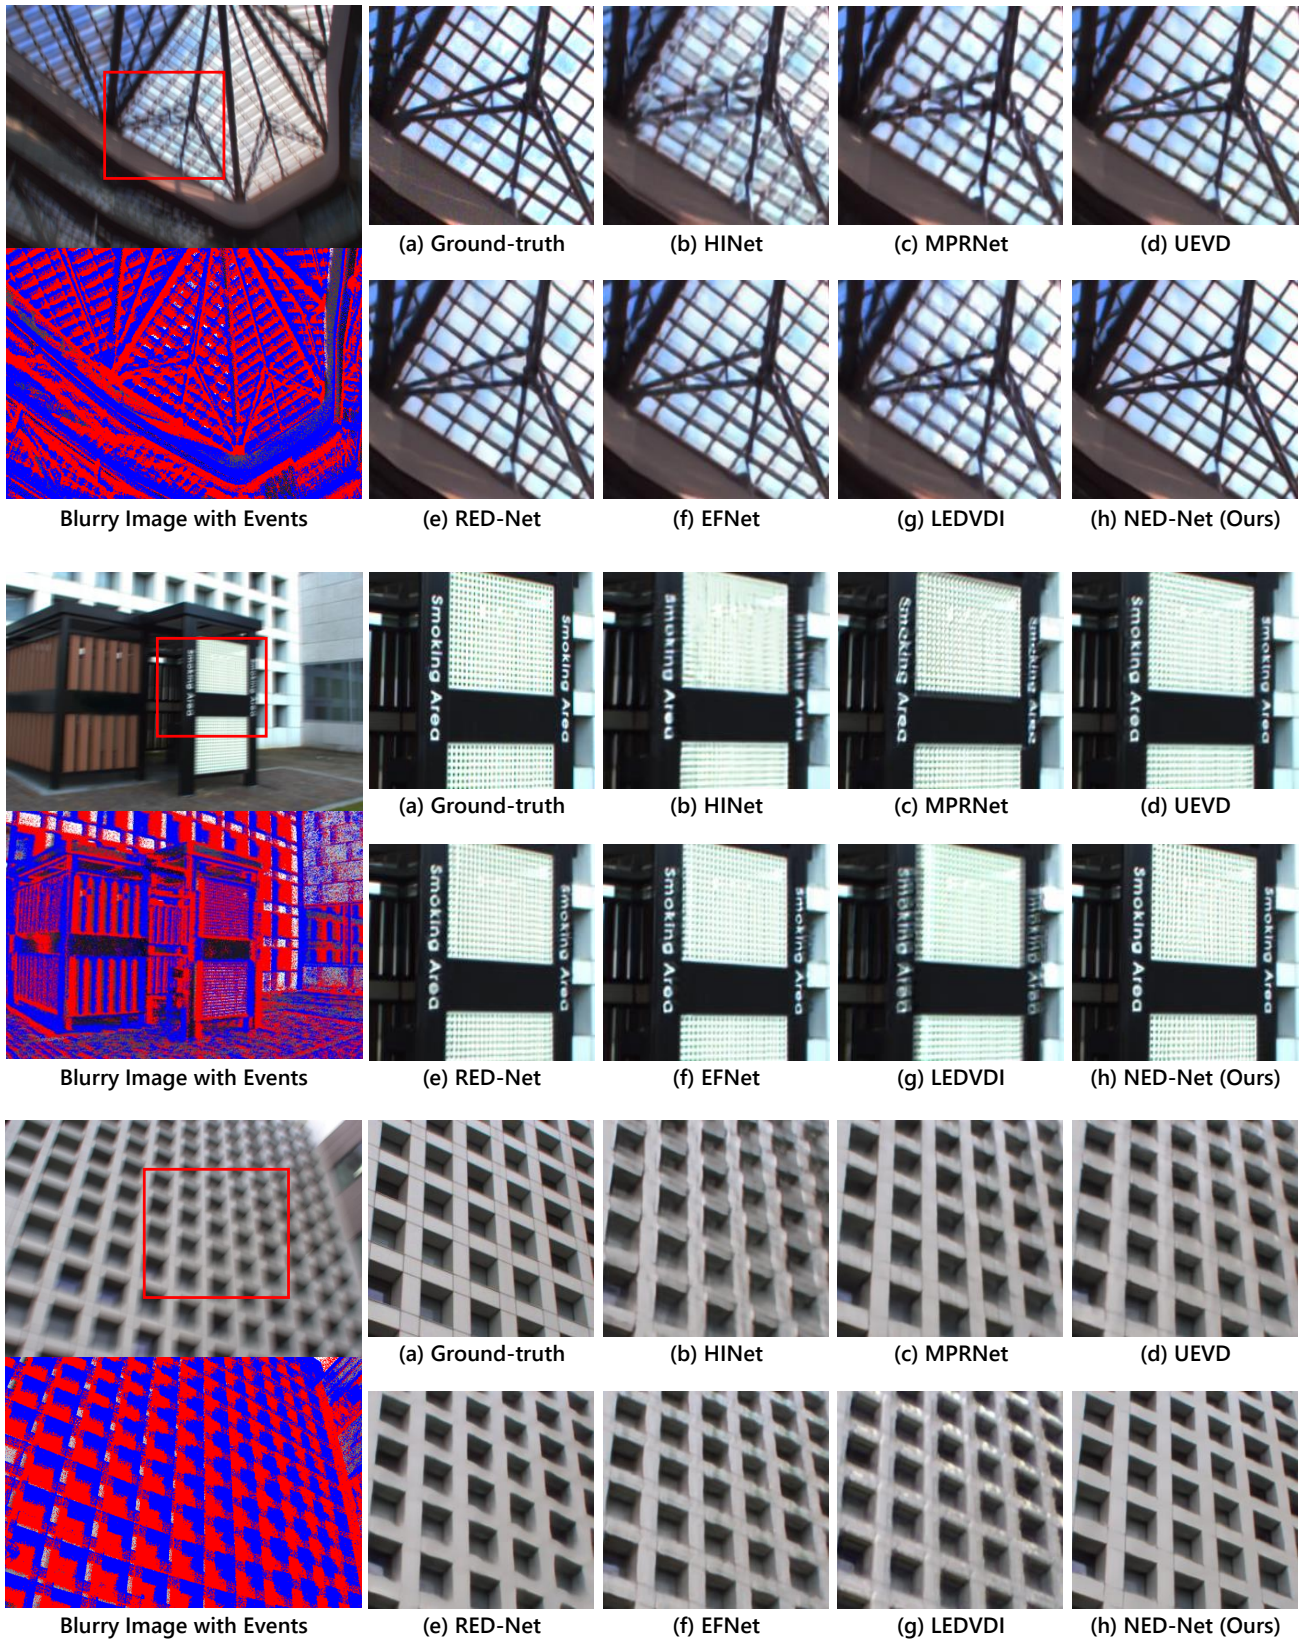

Figure 4: Qualitative comparison for the proposed method with other methods on the NCER-F dataset.



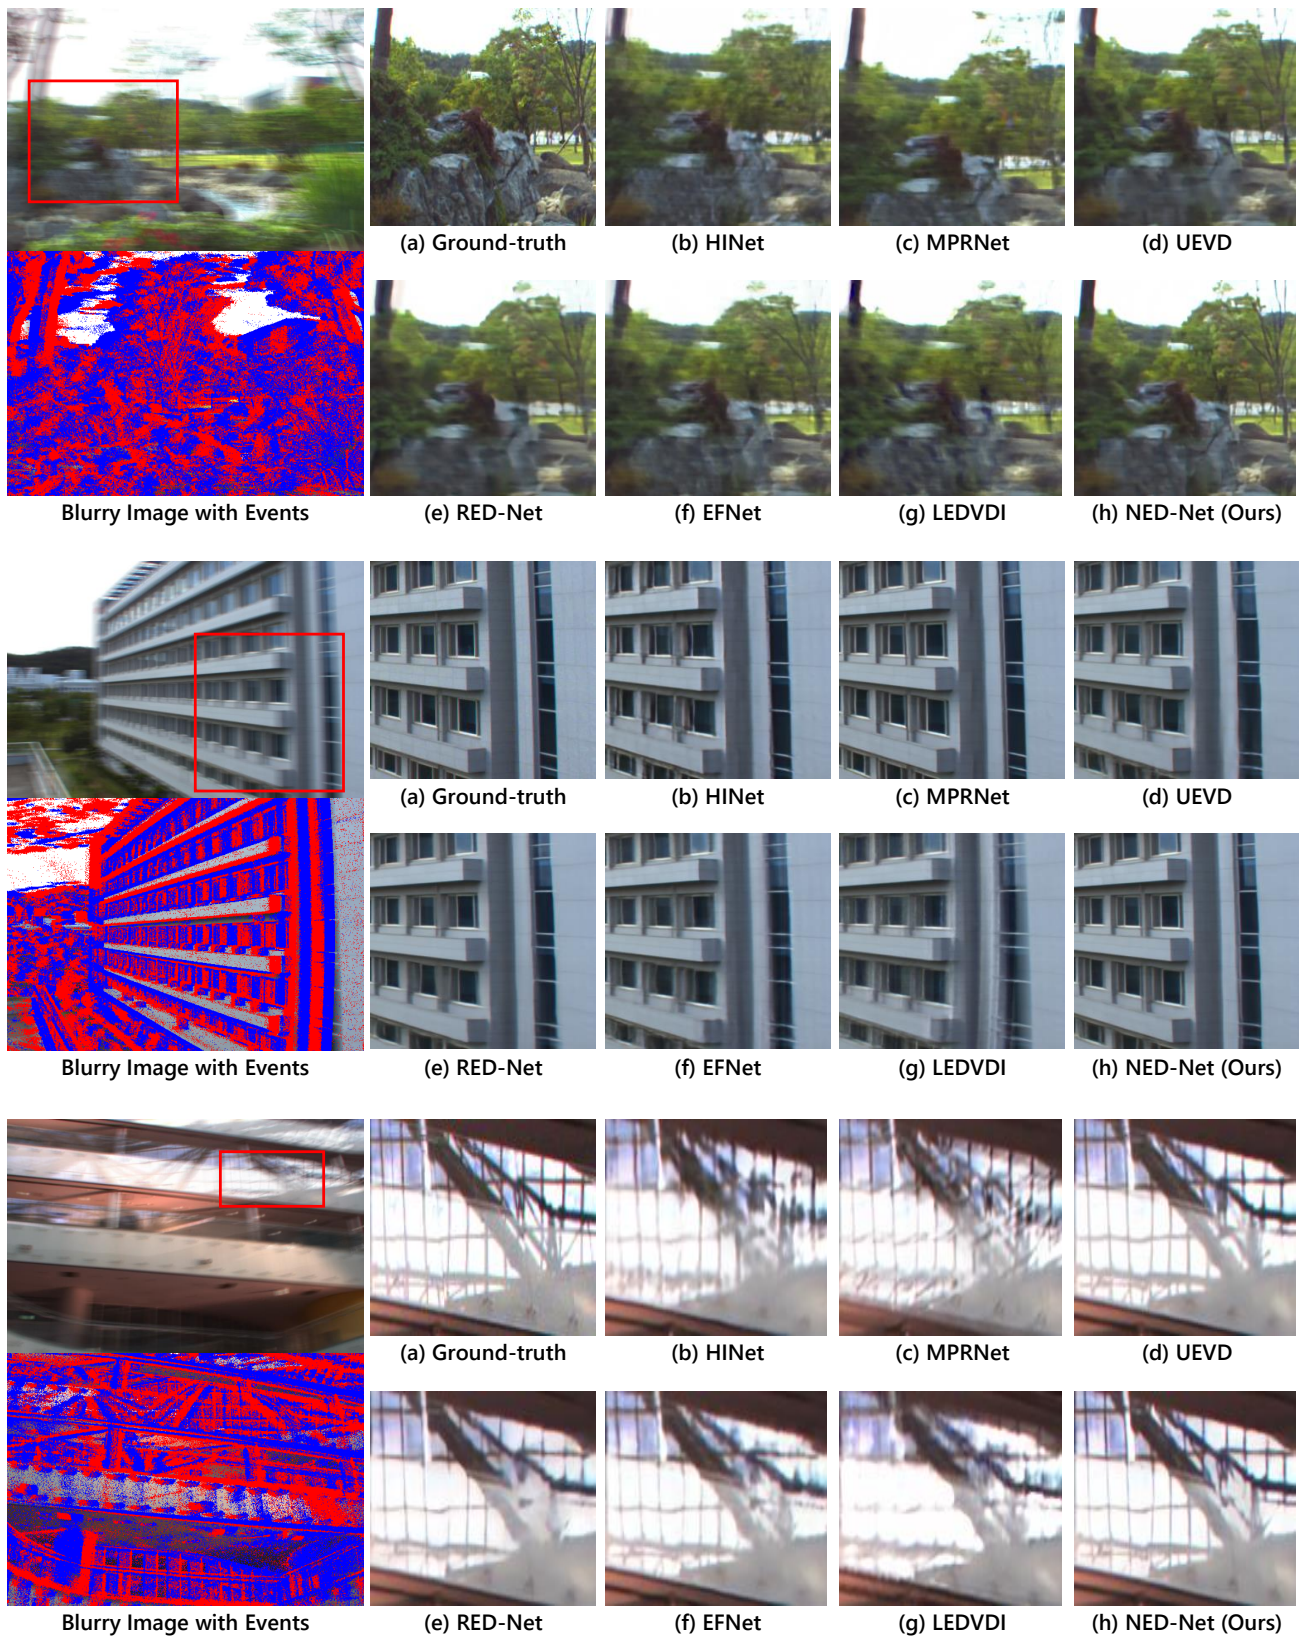

Figure 5: Qualitative comparison for the proposed method with other methods on the NCER-F dataset.



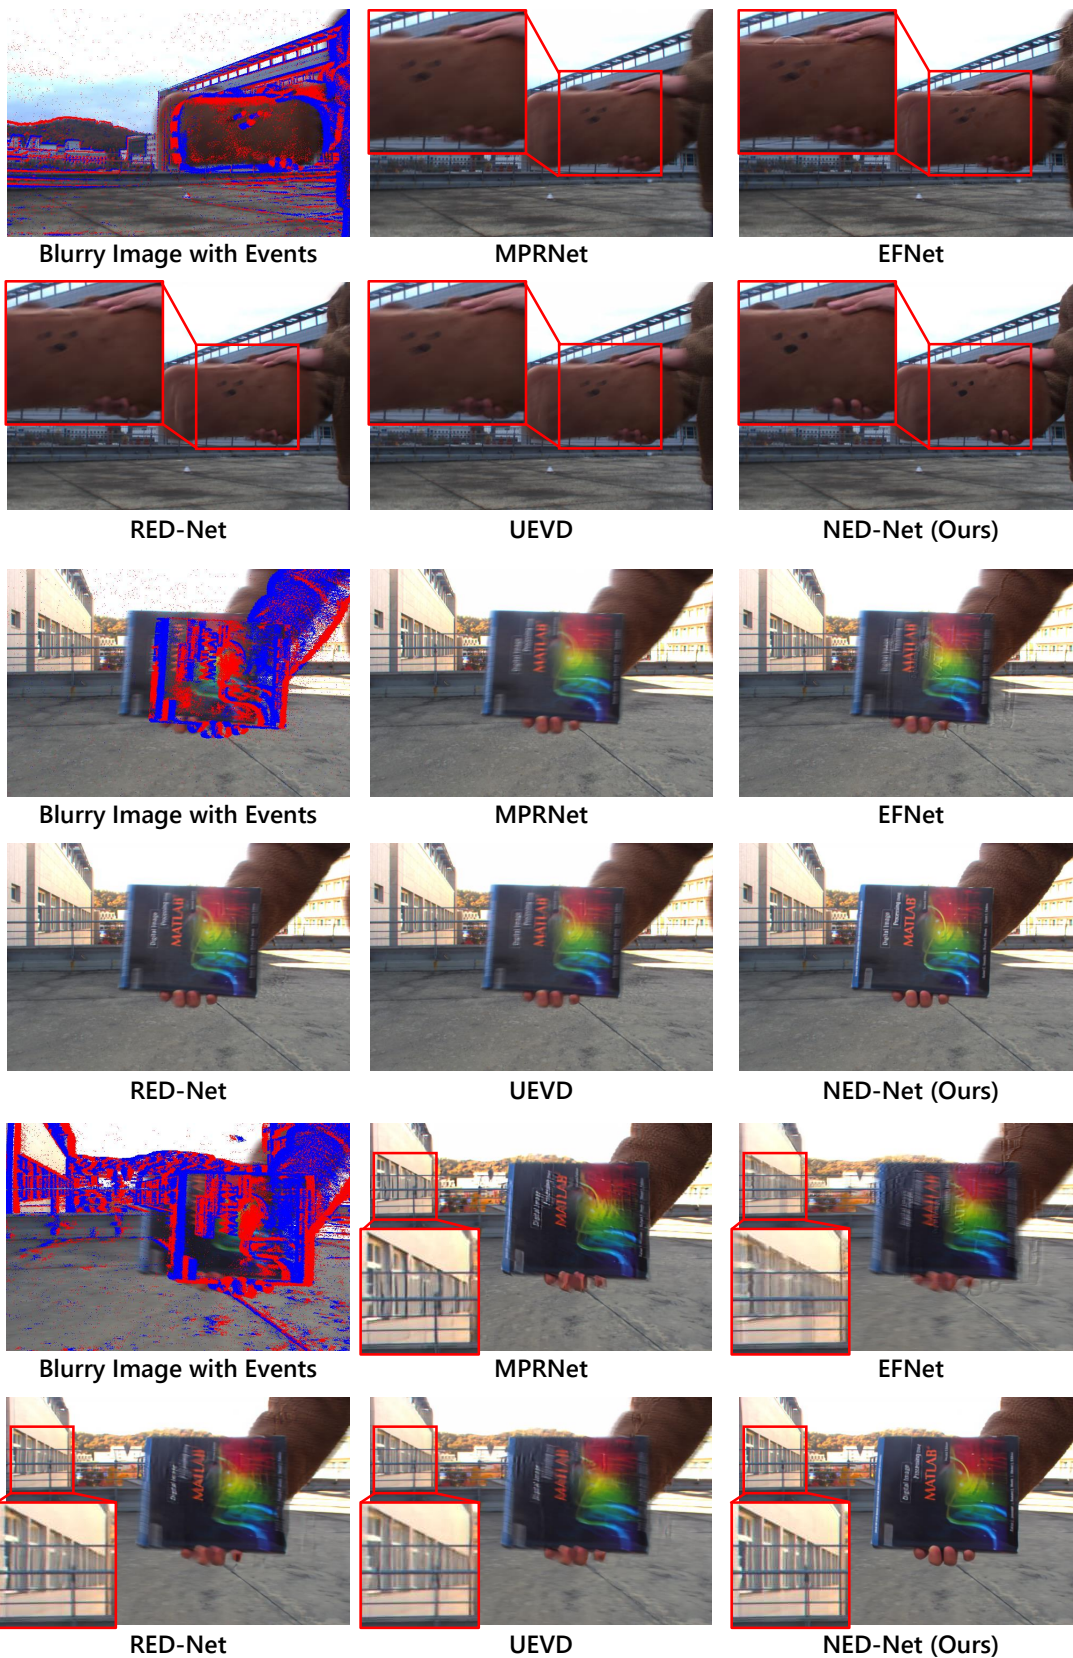

Figure 6: Qualitative comparison on the NCER-E dataset without fine-tuning. Please zoom for better view.

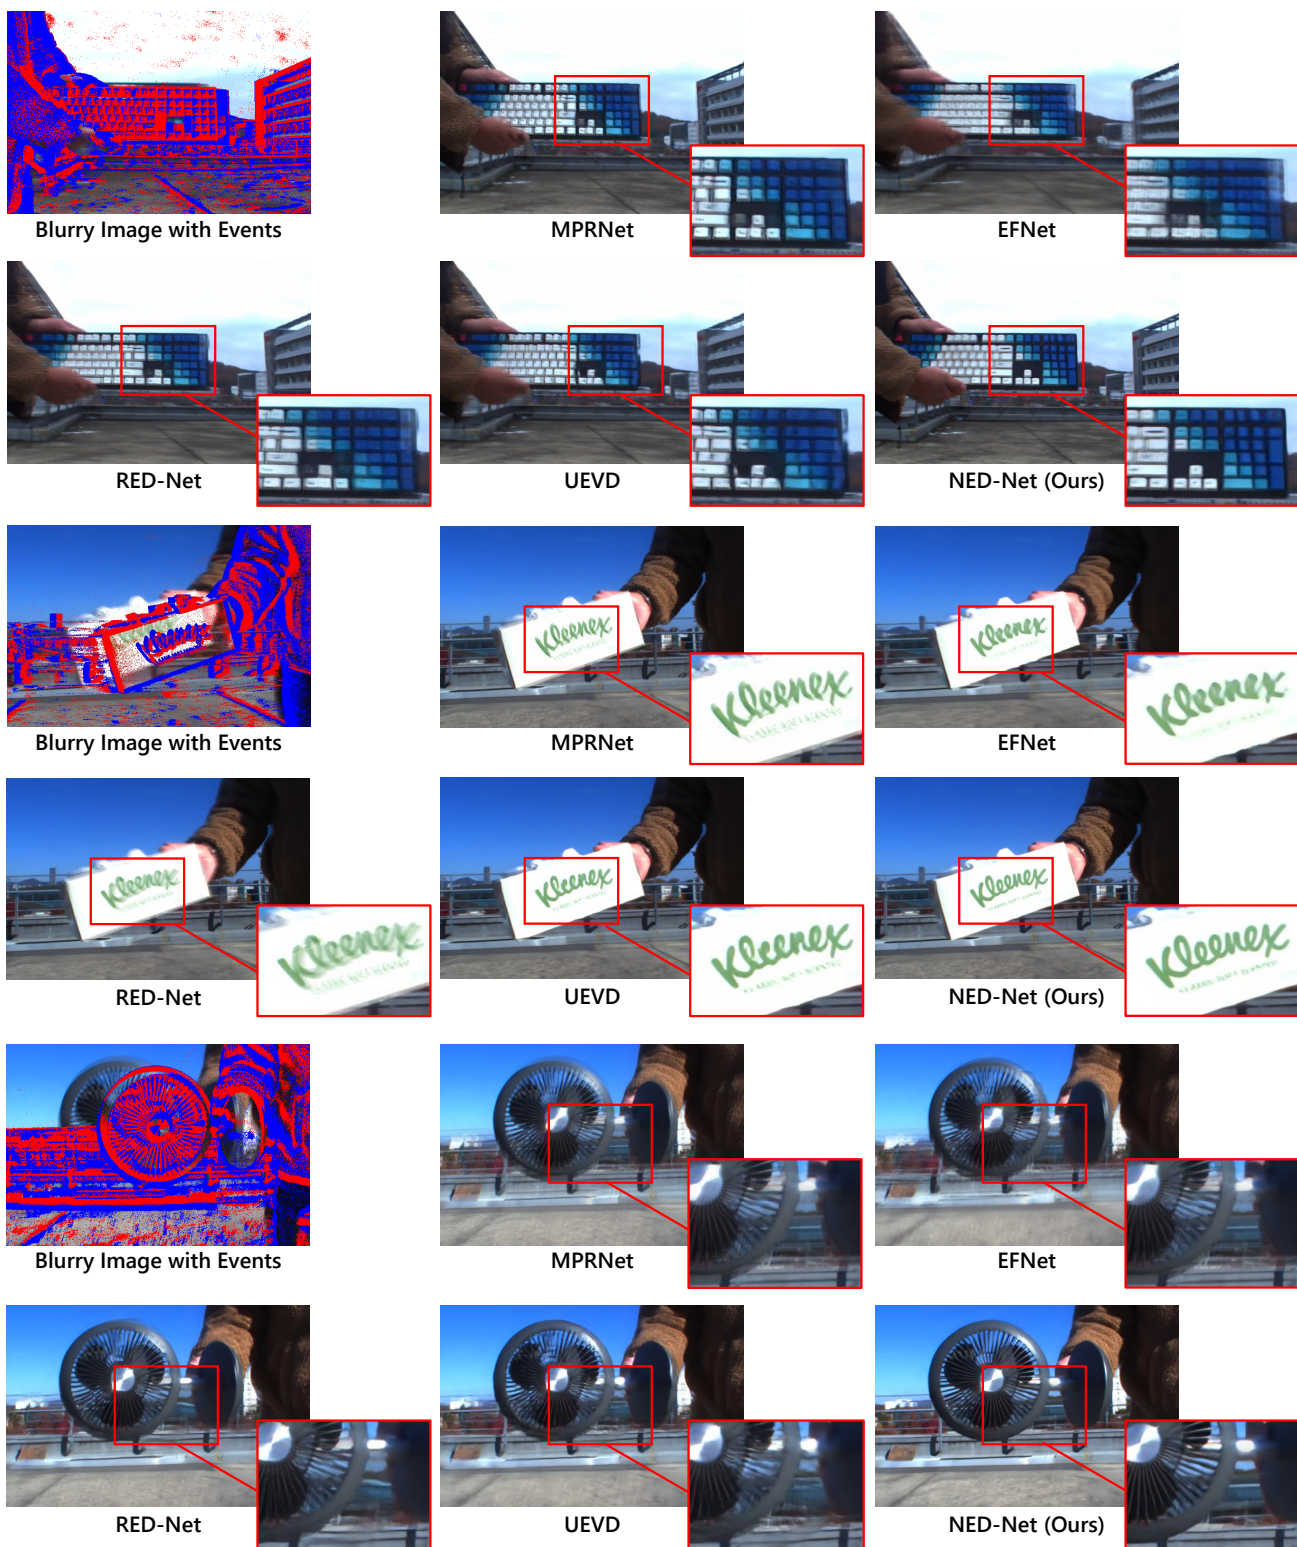

Figure 7: Qualitative comparison on the NCER-E dataset with fine-tuning. Please zoom for better view.



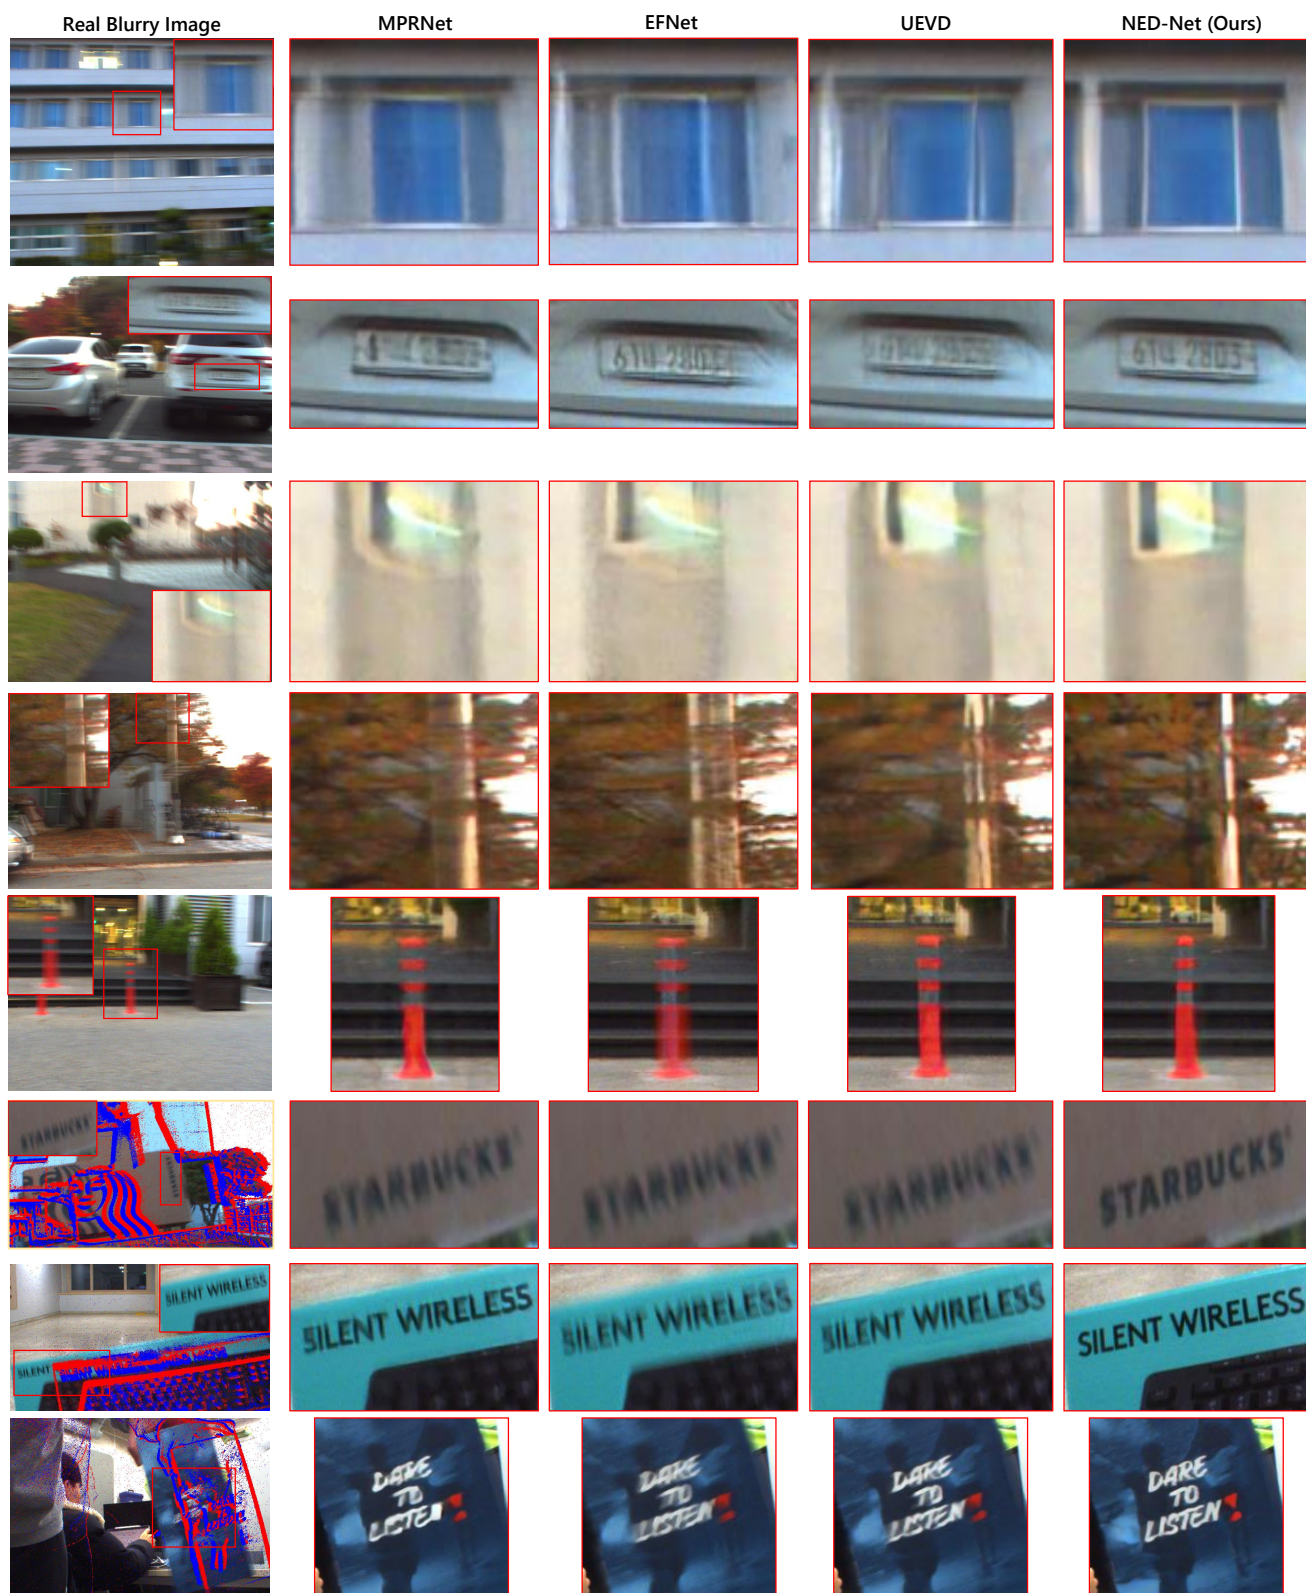

Figure 8: Qualitative comparison on the real blurry samples.
