# Supplementary material
Source: ML conference proceedings conference paper supplement (https://openaccess.thecvf.com/content/ICCV2023/html/Cho_Non-Coaxial_Event-Guided_Motion_ICCV_2023_paper.html)
Supplement: Supplementary file 2 [file Cho_Non-Coaxial_Event-Guided_Motion_ICCV_2023_supplemental.zip]

Archive with 2 entries (2 files):
- 02652_supple.pdf
- 02652_supplementary_compress.mp4
